# Supplementary material
Source: PubMed Central journal article supplement (PMC6130953)
Supplement: supp_RA118.002787_136515_2_supp_165290_pbhnx5.pdf [file supp_RA118.002787_136515_2_supp_165290_pbhnx5.pdf]

## Supporting Information

### *Amyloid $\beta$ fibrils assembled on ganglioside-enriched membranes contain both parallel $\beta$ -sheets and turns*

Teruhiko Matsubara, Hanaki Yasumori, Koichiro Ito, Takafumi Shimoaka, Takeshi Hasegawa, and  
Toshinori Sato

#### Contents

**Table S1. Peak assignment of reflection-absorption spectra collected from GM1- or GlcCer-enriched membranes incubated with A $\beta$ <sub>40</sub>.**

**Figure S1. AFM images of a GM1/sphingomyelin/cholesterol (20:40:40) membrane in water.**

**Figure S2. Raw (blue line) and second-derivative (red line) reflection-absorption amide I and II spectra of A $\beta$ <sub>40</sub> fibrils deposited for 15 min–72 h on GM1/sphingomyelin/cholesterol (20:40:40)(A) and GlcCer/sphingomyelin/cholesterol (20:40:40)(B).**

**Table S1. Peak assignment of reflection-absorption spectra collected from GM1- or GlcCer-enriched membranes incubated with A $\beta$ <sub>40</sub>.**

| Wavenumber (cm <sup>-1</sup> ) |      |      |      |                          |      | Assignment <sup>*3</sup>                               | Reference |
|--------------------------------|------|------|------|--------------------------|------|--------------------------------------------------------|-----------|
| 20% GM1 <sup>*1</sup>          |      |      |      | 20% GlcCer <sup>*2</sup> |      |                                                        |           |
| 15 min                         | 24 h | 48 h | 72 h | 15 min                   | 72 h |                                                        |           |
| 3316                           | 3318 | 3295 | 3293 | 3315                     | 3292 | O-H, N-H stretching                                    | [1]       |
| 2961                           | 2960 | 2959 | 2959 | 2961                     | 2962 | Asymmetric stretching -CH <sub>3</sub>                 | [1][2]    |
| 2928                           | 2928 | 2928 | 2926 | 2928                     | 2927 | Asymmetric stretching -CH <sub>2</sub> -               | [1][2]    |
| 2879                           | 2876 | 2875 | 2873 | 2879                     | 2874 | Symmetric stretching -CH <sub>3</sub>                  | [1]       |
| 2857                           | 2855 | 2857 | 2854 | 2857                     | 2853 | Symmetric stretching -CH <sub>2</sub> -                | [1][2]    |
| 1742                           | 1740 | 1742 | 1745 | 1745                     | 1746 | C=O stretching                                         | [2]       |
| 1676                           | 1672 | 1665 | 1663 | 1678                     | 1668 | Amide I                                                | [2][3]    |
| 1538                           | 1540 | 1542 | 1541 | 1539                     | 1542 | Amide II                                               | [2][3]    |
| 1467                           | 1468 | 1457 | 1456 | 1467                     | 1466 | Scissoring bending -CH <sub>2</sub> -                  | [1][2]    |
| 1381                           | 1379 | 1383 | 1385 | 1380                     | 1390 | Scissoring bending -CH <sub>3</sub>                    | [1][2][3] |
| 1240                           | -    | 1241 | 1241 | 1238                     | 1239 | PO <sub>2</sub> <sup>-</sup> asymmetric stretching     | [2]       |
| 1057                           | 1061 | 1056 | 1074 | 1057                     | 1064 | PO <sub>2</sub> <sup>-</sup> symmetric, C-O stretching | [2]       |

<sup>\*1</sup>, POPC + GM1/sphingomyelin/cholesterol (20:40:40) bilayer; <sup>\*2</sup>, POPC + GlcCer/sphingomyelin/cholesterol (20:40:40) bilayer; <sup>\*3</sup>, as shown in **Table 1**.

Assignments of 20% GM1 and 20% GlcCer at 0 min are shown as "POPC+GM1" and "POPC+GlcCer" in **Table 1**, respectively.

[1] Gun, J.; Iscovici, R.; Sagiv, J., *J. Colloid Interface Sci.* 1984, *101* (1), 201-213.

[2] Dreissig, I.; Machill, S.; Salzer, R.; Krafft, C., *Spectrochimica Acta Part A* 2009, *71* (5), 2069-2075.

[3] Moore, D. J.; Rerek, M. E.; Mendelsohn, R., *J. Phys. Chem. B* 1997, *101* (44), 8933-8940.

## GM1/sphingomyelin/cholesterol (20:40:40) + A $\beta$ <sub>40</sub> in water

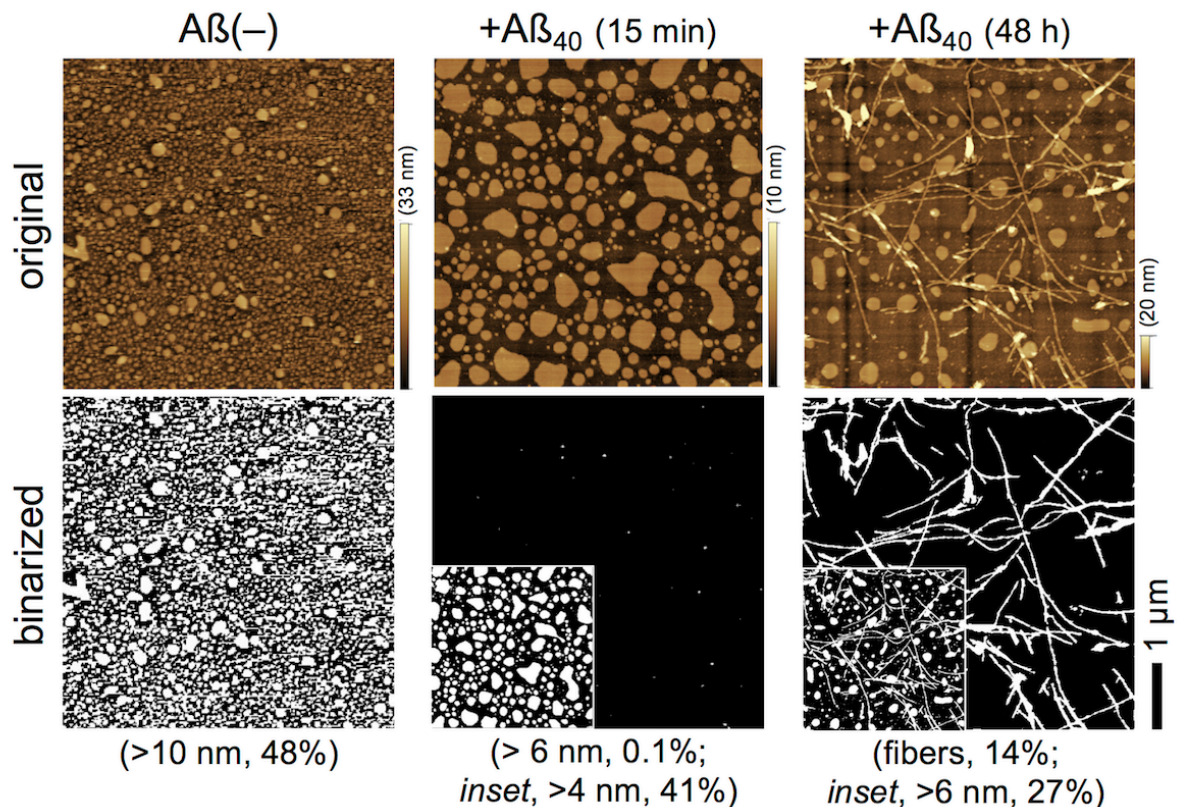

**Figure S1. AFM images of a GM1/sphingomyelin/cholesterol (20:40:40) membrane in water.** The membrane was incubated with 10  $\mu$ M A $\beta$ <sub>40</sub> in PBS for 15 min and 48 h at 25 °C, washed, and imaged in water (*upper*). Surface heights are indicated by color bars. Binarized AFM images were obtained by thresholding at 4–10 nm from the bottom, and percentages represent the total areas higher than the indicated height (*lower*). Fibrous A $\beta$ <sub>40</sub> after 48 h of incubation was extracted from the binarized image (14%; *lower right*). Scale bar, 1  $\mu$ m.

### A GM1-enriched + A $\beta$ <sub>40</sub>

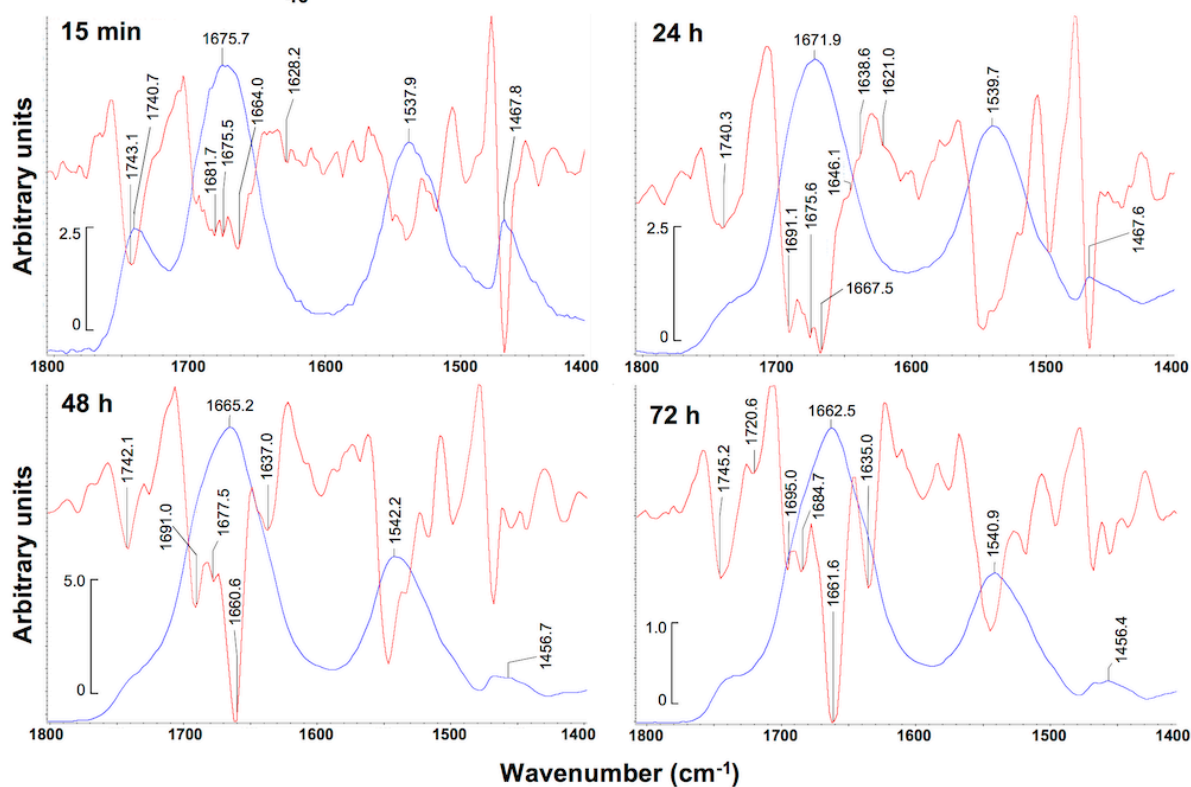

### B GlcCer-enriched + A $\beta$ <sub>40</sub>

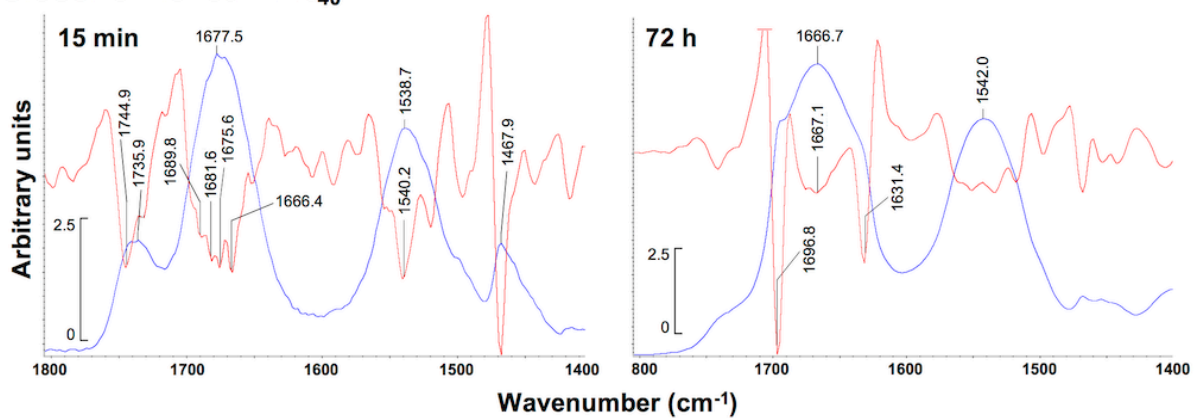

Figure S2. Raw (blue line) and second-derivative (red line) reflection-absorption amide I and II spectra of A $\beta$ <sub>40</sub> fibrils deposited for 15 min–72 h on GM1/sphingomyelin/cholesterol (20:40:40)(A) and GlcCer/sphingomyelin/cholesterol (20:40:40)(B).
